# Supplementary material for: Peer Victimization and Onset of Social Anxiety Disorder in Children and Adolescents
Source: PubMed Central journal article supplement (PMC6627045; doi:10.3390/brainsci9060132), 2019-06-06
Supplement: brainsci-09-00132-s001.pdf [file brainsci-09-00132-s001.pdf]

## Supplementary Information

# Peer Victimization and Onset of Social Anxiety Disorder in Children and Adolescents

Maria Pontillo \*, Maria Cristina Tata, Roberto Averna, Francesco Demaria, Prisca Gargiullo, Silvia Guerrera, Maria Laura Pucciarini, Ornella Santonastaso and Stefano Vicari

Child and Adolescence Neuropsychiatry Unit, Department of Neuroscience, Children Hospital Bambino Gesù, Piazza Sant'Onofrio 4, 00165 Rome, Italy; [mariacristina.tata@opbg.net](mailto:mariacristina.tata@opbg.net) (M.C.T.); [roberto.averna@opbg.net](mailto:roberto.averna@opbg.net) (R.A.); [francesco.demaria@opbg.net](mailto:francesco.demaria@opbg.net) (F.D.); [prisca.gargiullo@opbg.net](mailto:prisca.gargiullo@opbg.net) (P.G.); [silvia.guerrera@opbg.net](mailto:silvia.guerrera@opbg.net) (S.G.); [laura.pucciarini@gmail.com](mailto:laura.pucciarini@gmail.com) (M.L.P.); [ornella.santonastaso@libero.it](mailto:ornella.santonastaso@libero.it) (O.S.); [stefano.vicari@opbg.net](mailto:stefano.vicari@opbg.net) (S.V.)

\* Correspondence: [maria.pontillo@opbg.net](mailto:maria.pontillo@opbg.net); Tel.: +39-0668-592030

**Table S1.** Search Strategy.

| Search                                                          | Query                                                                                                                                                                                | Items found |
|-----------------------------------------------------------------|--------------------------------------------------------------------------------------------------------------------------------------------------------------------------------------|-------------|
| Recent queries in Pubmed on January 18, 2019                    |                                                                                                                                                                                      |             |
| 1                                                               | Bullying                                                                                                                                                                             | 5660        |
| 2                                                               | Peer victimization                                                                                                                                                                   | 1787        |
| 3                                                               | ((bullying OR peer victimization)) AND social phobia                                                                                                                                 | 28          |
| 4                                                               | ((bullying OR peer victimization)) AND (social phobia OR social anxiety disorder)                                                                                                    | 109         |
| 5                                                               | ((((bullying OR peer victimization)) AND (social phobia OR social anxiety disorder)) AND (children AND adolescents))                                                                 | 58          |
| 6                                                               | (((((bullying OR peer victimization)) AND (social phobia OR social anxiety disorder)) AND (children AND adolescents))) AND ("2011"[Date - Publication] : "2018"[Date - Publication]) | 50          |
| Recent queries in Cochrane Library database on January 18, 2019 |                                                                                                                                                                                      |             |
| 1                                                               | (((((bullying OR peer victimization)) AND (social phobia OR social anxiety disorder)) AND (children AND adolescents))) AND ("2011"[Date - Publication] : "2018"[Date - Publication]) | 8           |
| Recent queries in Cinhal Complete on January 18, 2019           |                                                                                                                                                                                      |             |
| 1                                                               | (((((bullying OR peer victimization)) AND (social phobia OR social anxiety disorder)) AND (children AND adolescents))) AND ("2011"[Date - Publication] : "2018"[Date - Publication]) | 10          |
| Recent queries in Scopus on January 18, 2019                    |                                                                                                                                                                                      |             |
| 1                                                               | (((((bullying OR peer victimization)) AND (social phobia OR social anxiety disorder)) AND (children AND adolescents))) AND ("2011"[Date - Publication] : "2018"[Date - Publication]) | 61          |
